# Supplementary material
Source: PubMed Central journal article supplement (PMC5461168)
Supplement: NIHMS861141-supplement-supplement_1.pdf [file NIHMS861141-supplement-supplement_1.pdf]

**Supplemental Table 1. Regression Estimates on annual per capita Medicare Expenditures: Effects of Dementia Severity and Number of Comorbidities.**

| Variables                                 |                          | Coeff. | (se)    | p-values | 95% Confidence Intervals |        |
|-------------------------------------------|--------------------------|--------|---------|----------|--------------------------|--------|
| Comorbidities                             | Elixhauser=0 (reference) |        |         |          |                          |        |
|                                           | Elixhauser=1             | 0.840  | (0.059) | <0.001   | 0.721                    | 0.959  |
|                                           | Elixhauser=2             | 1.432  | (0.066) | <0.001   | 1.300                    | 1.564  |
|                                           | Elixhauser≥3             | 2.394  | (0.052) | <0.001   | 2.291                    | 2.497  |
| CDR                                       | CDR=0 (reference)        |        |         |          |                          |        |
|                                           | CDR=0.5/1                | 0.214  | (0.100) | 0.032    | 0.014                    | 0.414  |
|                                           | CDR≥2                    | 0.372  | (0.189) | 0.048    | 0.005                    | 0.750  |
| Interaction with CDR=0.5/1                | Elixhauser=1             | 0.216  | (0.175) | 0.217    | -0.134                   | 0.566  |
|                                           | Elixhauser=2             | 0.328  | (0.167) | 0.043    | -0.005                   | 0.662  |
|                                           | Elixhauser≥3             | -0.136 | (0.138) | 0.322    | -0.411                   | 0.139  |
| Interaction with CDR≥2                    | Elixhauser=1             | 0.071  | (0.407) | 0.862    | -0.743                   | 0.884  |
|                                           | Elixhauser=2             | -0.068 | (0.276) | 0.805    | -0.620                   | 0.484  |
|                                           | Elixhauser≥3             | -0.301 | (0.232) | 0.195    | -0.756                   | 0.154  |
| Age                                       |                          | 0.066  | (0.017) | <0.001   | 0.032                    | 0.099  |
| Female=1                                  |                          | 0.013  | (0.046) | 0.779    | -0.078                   | 0.104  |
| Black=1                                   |                          | -0.036 | (0.051) | 0.485    | -0.136                   | 0.065  |
| Hispanic=1                                |                          | 0.076  | (0.067) | 0.254    | -0.055                   | 0.207  |
| Years of education                        |                          | 0.007  | (0.006) | 0.187    | -0.004                   | 0.018  |
| Married=1                                 |                          | -0.067 | (0.046) | 0.147    | -0.157                   | 0.024  |
| Medicaid eligible=1                       |                          | -0.184 | (0.053) | 0.001    | -0.289                   | -0.079 |
| Died in current year                      |                          | 0.789  | (0.141) | <0.001   | 0.513                    | 1.065  |
| moderate or worse<br>extrapyramidal signs |                          | 0.319  | (0.100) | 0.001    | 0.123                    | 0.514  |
